# Supplementary material for: Application of the Method Evaluation and Risk Assessment Tool for a Small-Scale Grouper Fishery in Indonesia
Source: MDPI journal article supplement (doi:10.3390/fishes8100498), 2023-10-05
Supplement: s1 [file s1]

Archive with 1 entries (1 files):
- fishes-2615400-supplementary.pdf
